# Supplementary material for: Impact of Palliative Care in Evaluating and Relieving Symptoms in Patients with Advanced Cancer. Results from the DEMETRA Study
Source: MDPI journal article supplement (doi:10.3390/ijerph17228429), 2020-11-14
Supplement: s1 [file s1]

**Supplementary Table 5.** Changes in symptom prevalence between day 0 and day 7 in 508 patients according to care setting.

| Symptoms         | Setting              | Prevalence, N (%) |            | p value <sup>a</sup> |
|------------------|----------------------|-------------------|------------|----------------------|
|                  |                      | Day 0             | Day 7      |                      |
| Asthenia         | Home                 | 348 (93.5)        | 352 (94.6) | NS                   |
|                  | Hospice              | 85 (92.4)         | 81 (88.0)  | NS                   |
|                  | Hospital             | 39 (88.6)         | 41 (93.2)  | NS                   |
|                  | p value <sup>b</sup> | NS                | NS         |                      |
| Poor well-being  | Home                 | 302 (81.2)        | 302 (81.2) | NS                   |
|                  | Hospice              | 63 (68.5)         | 66 (71.7)  | NS                   |
|                  | Hospital             | 31 (70.5)         | 31 (70.5)  | NS                   |
|                  | p value <sup>b</sup> | <0.001            | <0.01      |                      |
| Lack of appetite | Home                 | 280 (75.3)        | 280 (75.3) | NS                   |
|                  | Hospice              | 68 (73.9)         | 56 (60.9)  | <0.05                |
|                  | Hospital             | 26 (59.1)         | 26 (59.1)  | NS                   |
|                  | p value <sup>b</sup> | NS                | <0.01      |                      |
| Drowsiness       | Home                 | 264 (71.0)        | 263 (70.7) | NS                   |
|                  | Hospice              | 64 (69.6)         | 63 (68.5)  | NS                   |
|                  | Hospital             | 29 (65.9)         | 25 (56.8)  | NS                   |
|                  | p value <sup>b</sup> | NS                | <0.05      |                      |
| Pain             | Home                 | 267 (71.8)        | 252 (67.7) | NS                   |
|                  | Hospice              | 45 (48.9)         | 42 (45.7)  | NS                   |
|                  | Hospital             | 31 (70.5)         | 25 (56.8)  | NS                   |
|                  | p value <sup>b</sup> | <0.001            | <0.001     |                      |
| Depression       | Home                 | 224 (60.2)        | 234 (62.9) | NS                   |
|                  | Hospice              | 67 (72.8)         | 63 (68.5)  | NS                   |
|                  | Hospital             | 13 (29.5)         | 22 (50.0)  | <0.05                |
|                  | p value <sup>b</sup> | <0.001            | NS         |                      |
| Anxiety          | Home                 | 209 (56.2)        | 230 (61.8) | <0.05                |
|                  | Hospice              | 56 (60.9)         | 48 (52.2)  | NS                   |
|                  | Hospital             | 25 (56.8)         | 23 (52.3)  | NS                   |
|                  | p value <sup>b</sup> | NS                | NS         |                      |
| Breathlessness   | Home                 | 182 (48.9)        | 151 (40.6) | <0.001               |
|                  | Hospice              | 36 (39.1)         | 29 (31.5)  | NS                   |
|                  | Hospital             | 15 (34.1)         | 12 (27.3)  | NS                   |
|                  | p value <sup>b</sup> | NS                | NS         |                      |
| Nausea           | Home                 | 187 (50.3)        | 168 (45.2) | <0.05                |
|                  | Hospice              | 30 (32.6)         | 17 (18.5)  | <0.01                |
|                  | Hospital             | 8 (18.2)          | 7 (15.9)   | NS                   |
|                  | p value <sup>b</sup> | <0.001            | <0.001     |                      |

NS, not statistically significant; SD, standard deviation. <sup>a</sup>p value for difference between day 7 and day 0; <sup>b</sup>p value for difference between care settings.
