# Supplementary material for: Impact of Palliative Care in Evaluating and Relieving Symptoms in Patients with Advanced Cancer. Results from the DEMETRA Study
Source: MDPI journal article supplement (doi:10.3390/ijerph17228429), 2020-11-14
Supplement: s1 [file s1]

**Supplementary Table 3.** Prevalence of symptoms experienced by 865 patients at baseline in relation to four major primary tumor sites.

| Symptoms         | Primary tumor site,<br>prevalence of symptoms (%) |                    |                        |                  |
|------------------|---------------------------------------------------|--------------------|------------------------|------------------|
|                  | Lung<br>(N=151)                                   | Pancreas<br>(N=76) | Colon-rectum<br>(N=75) | Breast<br>(N=50) |
| Asthenia         | 89.4                                              | 89.5               | 90.7                   | 88.0             |
| Poor well-being  | 72.8                                              | 75.0               | 73.3                   | 66.0             |
| Lack of appetite | 71.5                                              | 75.0               | 77.3                   | 66.0             |
| Drowsiness       | 64.2                                              | 57.9               | 69.3                   | 76.0             |
| Pain             | 66.9                                              | 69.7               | 66.7                   | 62.0             |
| Depression       | 57.0                                              | 68.4               | 61.3                   | 58.0             |
| Anxiety          | 57.6                                              | 57.9               | 45.3                   | 68.0             |
| Breathlessness   | 59.6                                              | 35.5               | 40.0                   | 30.0             |
| Nausea           | 35.8                                              | 55.3               | 48.0                   | 40.0             |
