# Supplementary material for: Impact of Palliative Care in Evaluating and Relieving Symptoms in Patients with Advanced Cancer. Results from the DEMETRA Study
Source: MDPI journal article supplement (doi:10.3390/ijerph17228429), 2020-11-14
Supplement: s1 [file s1]

**Supplementary Table 4.** Changes in intensity of main symptoms between day 0 and day 7 in 508 patients with severe degree of intensity at baseline.

| Symptoms         | N patients | Intensity, mean (SD) |             |                            | p value <sup>a</sup> |
|------------------|------------|----------------------|-------------|----------------------------|----------------------|
|                  |            | Day 0                | Day 7       | Difference (Day 7 – Day 0) |                      |
| Asthenia         | 282        | 6.74 (1.63)          | 5.50 (2.43) | -1.24 (2.41)               | <0.001               |
| Poor well-being  | 222        | 6.55 (1.41)          | 5.21 (2.38) | -1.34 (2.41)               | <0.001               |
| Lack of appetite | 194        | 6.86 (1.66)          | 5.17 (2.91) | -1.69 (2.83)               | <0.001               |
| Drowsiness       | 150        | 6.51 (1.49)          | 4.57 (2.74) | -1.94 (2.75)               | <0.001               |
| Pain             | 162        | 6.16 (1.31)          | 3.96 (2.37) | -2.20 (2.57)               | <0.001               |
| Depression       | 136        | 6.63 (1.62)          | 5.04 (2.57) | -1.58 (2.55)               | <0.001               |
| Anxiety          | 109        | 6.47 (1.50)          | 4.86 (2.49) | -1.61 (2.39)               | <0.001               |
| Breathlessness   | 104        | 6.56 (1.59)          | 5.00 (2.75) | -1.56 (2.46)               | <0.001               |
| Nausea           | 71         | 6.46 (1.56)          | 4.03 (3.02) | -2.44 (3.02)               | <0.001               |

NS, not statistically significant; SD, standard deviation. <sup>a</sup>p value for difference between day 7 and day 0.
