# Supplementary material for: Impact of Palliative Care in Evaluating and Relieving Symptoms in Patients with Advanced Cancer. Results from the DEMETRA Study
Source: MDPI journal article supplement (doi:10.3390/ijerph17228429), 2020-11-14
Supplement: s1 [file s1]

**Supplementary Table S1.** Number of symptoms simultaneously experienced by the 865 study patients at baseline.

| Number of symptoms | Patients |      |
|--------------------|----------|------|
|                    | N        | %    |
| ≤4                 | 68       | 7.9  |
| 5                  | 57       | 6.6  |
| 6                  | 75       | 8.7  |
| 7                  | 87       | 10.1 |
| 8                  | 89       | 10.3 |
| 9                  | 109      | 12.6 |
| 10                 | 65       | 7.5  |
| 11                 | 64       | 7.4  |
| 12                 | 85       | 9.8  |
| 13                 | 39       | 4.5  |
| 14                 | 42       | 4.9  |
| ≥15                | 85       | 9.8  |
