# Supplementary material for: Impact of Palliative Care in Evaluating and Relieving Symptoms in Patients with Advanced Cancer. Results from the DEMETRA Study
Source: MDPI journal article supplement (doi:10.3390/ijerph17228429), 2020-11-14
Supplement: s1 [file s1]

**Supplementary Table S2.** Most frequent combinations of concomitant symptoms among 865 patients at baseline.

| Symptoms                                                | N symptoms | Patients |      |
|---------------------------------------------------------|------------|----------|------|
|                                                         |            | N        | %    |
| Asthenia, Poor well-being                               | 2          | 595      | 68.9 |
| Asthenia, Lack of appetite                              | 2          | 591      | 68.3 |
| Asthenia, Drowsiness                                    | 2          | 525      | 60.7 |
| Lack of appetite, Poor well-being                       | 2          | 518      | 60.0 |
| Lack of appetite, Asthenia, Poor well-being             | 3          | 507      | 58.6 |
| Asthenia, Pain                                          | 2          | 499      | 57.7 |
| Asthenia, Depression                                    | 2          | 466      | 53.9 |
| Asthenia, Drowsiness, Poor well-being                   | 3          | 451      | 52.1 |
| Asthenia, Drowsiness, Lack of appetite                  | 3          | 450      | 52.0 |
| Pain, Poor well-being                                   | 2          | 442      | 51.1 |
| Asthenia, Nausea                                        | 2          | 440      | 50.9 |
| Pain, Poor well-being, Asthenia                         | 3          | 430      | 49.7 |
| Pain, Lack of appetite                                  | 2          | 425      | 49.1 |
| Pain, Lack of appetite, Asthenia                        | 3          | 416      | 48.1 |
| Asthenia, Drowsiness, Poor well-being, Lack of appetite | 4          | 400      | 46.2 |
| Pain, Lack of appetite, Poor well-being, Asthenia       | 4          | 374      | 43.2 |
